# Supplementary material
Source: Royal Society of Chemistry journal article supplement (doi:10.1039/d6py00102e)
Supplement: d6py00102e1.pdf [file d6py00102e1.pdf]

Supplementary Information (SI) for Polymer Chemistry.  
This journal is © The Royal Society of Chemistry 2026

**Coupling Shear-Thickening and Dynamic Bonds in Self-Healing Materials:  
Synthesis, Regulation and Application**

Yuyang Meng,<sup>a</sup> Xinxing Zhang<sup>\*a</sup> and Xingchao Liu<sup>\*b</sup>

<sup>a</sup>State Key Laboratory of Polymer Materials Engineering, Polymer Research Institute, Sichuan University (Chengdu, 610065, China)

<sup>b</sup>Organ Transplantation Center, Sichuan Provincial People's Hospital, University of Electronic Science and Technology of China (Chengdu, 611731, Sichuan, China.)

\*Corresponding authors: Xinxing Zhang (E-mail address: [xxzwwh@scu.edu.cn](mailto:xxzwwh@scu.edu.cn));  
Xingchao Liu (E-mail address: [liuxingchao@med.uestc.edu.cn](mailto:liuxingchao@med.uestc.edu.cn))

Table S1. Comparison of key performance metrics for STDB systems.

| Examples | Materials                                         | Dynamic Bonds                 | Self-healing Property                                                                              | Critical Shear Rate                                                                           | Modulus Switching                                                         |
|----------|---------------------------------------------------|-------------------------------|----------------------------------------------------------------------------------------------------|-----------------------------------------------------------------------------------------------|---------------------------------------------------------------------------|
| Ref. 38  | polyborosiloxane/ $\beta$ -cyclodextrin           | B-O bonds                     | recyclable for 4,500 h through self-healing at low current densities                               | shear-thickening occurs when the shear rate exceeds the relaxation rate                       | hardening switching in response to current or mechanical frequency        |
| Ref. 112 | shear thickening gel/polyurethane sponge          | B-O bonds                     | reversible and complete recovery of electrical conductivity and mechanical properties after damage | across 0.1-100 Hz, the material switches from a linear viscoelastic state to a hardened state | the storage modulus $G'$ increased from 0.21 MPa to 1.52 MPa              |
| Ref. 40  | tetra-poly(ethylene glycol) hydrogels             | thia-conjugate addition bonds | healing kinetics depend on bond reversibility and exhibit relaxation times of 2-8 s.               | instantaneous shear-thickening induced by chain extension                                     | plateau modulus tunable from 60 Pa to 650 Pa                              |
| Ref. 68  | shear-thickening fluid/ $C_{60}$ composite system | D-A dynamic covalent bonds    | superior interfacial compatibility and recovery after damage                                       | upon $C_{60}$ incorporation, critical shear rate drops from 119 to 83.8 $s^{-1}$              | peak viscosity increment tunable to 42.7% via additive content adjustment |
| Ref. 72  | mamaku gum                                        | hydrogen bonds                | network reconstruction and strength recovery after standing                                        | $10^1$ - $10^2$ $s^{-1}$ (sharp viscosity increase with shear rate)                           | intermolecular H-bonding raises viscosity to 10 Pa·s                      |
